1    **Functional analysis of Scratch2 domains: implications in the**  
2                   **evolution of Snail transcriptional repressors**

3  
4    Tatiane Yumi Nakamura Kanno<sup>1</sup>, Mariana Soares Fogo<sup>1</sup>, Carolina Purcell Goes<sup>1</sup>, Felipe M. Viceli<sup>1,2</sup> and  
5    Chao Yun Irene Yan<sup>1\*</sup>

6  
7    <sup>1</sup> Department of Cell and Developmental Biology, Institute of Biomedical Sciences, Universidade de São  
8    Paulo, São Paulo, Brazil.

9    <sup>2</sup> Division of Biology and Biological Engineering, California Institute of Technology, Pasadena, CA 91125,  
10   USA.

11  
12   \*Corresponding author

13   E-mail: ireneyan@usp.br

14  
15   **Keywords:** Scratch, Transcription factor, Chicken Embryo, Snail superfamily, DNA binding protein,  
16   Nuclear translocation, Protein domain.

17

18

## 19 **Abstract**

20       The Snail superfamily of transcription factors have a modular organization and their  
21 similarities and divergences are the basis for subdividing the superfamily into the Snail1/2 and  
22 Scratch families. As it is generally accepted that the Snail and Scratch families originated through  
23 gene duplication, understanding the functional contribution of each module could provide us with  
24 further insight about the molecular and functional evolution of the Snail superfamily. Thus, in this  
25 work, we investigated the function of the SNAG and SCRATCH domains in chicken Scratch2.  
26 Through evolutionary comparison analysis we identified a novel HINGE domain that lies between  
27 the SNAG and SCRATCH domain. Similar to members of the Snail1/2 families, Scratch2-  
28 mediated transcriptional repression requires SNAG and nuclear localization requires the zinc-  
29 finger domain. We also identified a novel HINGE domain that lies between the SNAG and  
30 SCRATCH domain. HINGE is highly conserved in amniotes. Single mutations of the conserved  
31 Tyrosine and Serine residues of HINGE downregulated Scratch2-mediated transcriptional  
32 repression. This effect depended on the presence of the SCRATCH domain.

## 33 **Introduction**

34       The members of the Snail superfamily of transcription factors are key players in multiple  
35 embryological and pathological events (reviewed in [1] acting mainly as transcriptional repressors  
36 [2–4]. Similarities and divergences in their sequences subdivides the superfamily into the Snail1/2  
37 and Scratch families. This subdivision was originally based on sequence homology comparison,  
38 but it clearly correlates with functional differences as well. Both Snail and Scratch families  
39 modulate cell adhesion and migration. Whilst the effect of Snail is broader [5–7], Scratch is limited

40 to neural development, regulating neuronal migration during cortical formation, promoting neural  
41 fate and repressing neural precursor cell death [8–10].

42 All Snail superfamily members have a modular organization, including a conserved carboxy-  
43 terminal region containing zinc-fingers and a SNAG (Snaill/Gfi-1) domain in the amino-terminus.  
44 Scratch and Snail2 proteins present distinct conserved domains between the SNAG and zinc-  
45 fingers domains, called SCRATCH and SLUG domains, respectively. The correlation between  
46 domains and function has been much better characterized in the Snail than in the Scratch family.  
47 The zinc-finger region of Snail proteins recognizes a consensus DNA motif containing a core of  
48 six nucleotides known as E-boxes [11], and the SNAG domain of Snail1 interacts with a histone  
49 lysine-specific demethylase, repressing target genes [12]. The SLUG domain has also been  
50 reported to contribute to repression [13] and members of the Snail family that lack a SNAG domain  
51 repress through an alternative domain known as the CtBP domain [14].

52 In Scratch1, the repressor domain has also been attributed to the amino-terminus of the  
53 protein, but deletion of the SNAG domain in human Scratch1 does not reduce its ability to repress  
54 E-box-driven transcription [4]. Further, the Scratch family lacks an obvious alternative module  
55 such as the CtBP domain. Thus, the repressor domain in the Scratch family remains undefined. As  
56 it is generally accepted that the Snail and Scratch families originated through gene duplication,  
57 with the signature domains of each family arising through divergence of an ancestral gene [15],  
58 understanding the functional contribution of each module could provide us with further insight  
59 about the molecular and functional evolution of this superfamily.

60 In this work, we have investigated the biological role of different domains in Scratch2 (Sct2)  
61 through deletion and point mutations in the chicken orthologue. Our data suggest that Sct2  
62 requires SNAG for its repression activity. Also, we identified another conserved motif- HINGE-

63 that co-evolved with the SCRATCH domain. Scrt2-mediated transcriptional repression can be  
64 modulated by the SCRATCH domain through modifications in the HINGE -a novel region  
65 conserved in the Scrt2 subfamily.

## 66 **Material and methods**

### 67 *Generation of mutated and truncated proteins*

68 The pCIG-MYC-*cScrt2* containing chicken Scrt2 cDNA (JN982016.1) was previously  
69 cloned in our laboratory [16] and has been used as a template for the generation of wild-type  
70 truncated constructs. Full-length N-terminal FLAG-tagged single mutation constructs harboring  
71 substitutions tyrosine 77 to phenylalanine (*cScrt2*-Y77F) or glutamate (*cScrt2*-Y77E), or serine 78  
72 to alanine (*cScrt2*-S78A) or aspartate (*cScrt2*-S78D) were synthesized by GenScript USA Inc.  
73 (Piscataway, NJ). N-terminal FLAG-tagged *cScrt2*ΔSCRATCH (aa 97-116 deletion), the full-  
74 length double mutation constructs containing both Y77F and S78A (*cScrt2*-YS/FA) or Y77E and  
75 S78D (*cScrt2*-YS/ED), and Y77 or S78 substitutions in the absence of the SCRATCH domain  
76 (YFΔSCRATCH or SAΔSCRATCH) were synthesized by Integrated DNA technologies (IDT).  
77 All commercially purchased constructs were subcloned into pCIG, where expression of a  
78 bicistronic RNA with nuclear GFP reporter is driven by chicken beta-actin promoter [17]. The  
79 sequences for *cScrt2*ΔZnF (aa 1-127), *cScrt2*ΔN (aa 124-276), *cScrt2*ΔSNAG (aa 10-276),  
80 *cScrt2*S78AΔSNAG (aa 10-276, S78A) and *cScrt2*YS/FAΔSNAG (aa 10-276, Y77F and S78A)  
81 were PCR amplified flanked by EcoRI and SmaI sites and subcloned into pCIG or pMES. The  
82 latter differs from pCIG in that it the GFP lacks a nuclear localization signal and remains in the  
83 cytoplasm [18].

84

### 85 *In ovo electroporation*

86 Chicken embryos at stage HH10-HH12 [19] were electroporated with *cScrt2*WT, *cScrt2*-  
87 Y77F and *cScrt2*-S78A. Electroporated cells were identified by the presence of GFP. Briefly, a  
88 small window was made at the top of the egg shell to reach the embryo. The embryos were  
89 visualized with sterile Indian ink 10% (diluted in Howard Ringer's saline solution) injected under  
90 the blastoderm. The plasmid solution (concentration of 3 µg/ml) containing the inert tracer  
91 FastGreen 0.2% was injected into the truncal neural tube lumen. Then, the platinum electrodes  
92 were placed at a distance of 4 mm flanking the neural tube and 5 pulses of 20 V with 30 ms of  
93 length and 100 ms of interval were administered [17,20]. Embryos were re-incubated and collected  
94 24 hours later.

95

#### 96 *HEK293T culture and transfection*

97 Established HEK293T cells were cultured in DMEM supplemented with 10% FBS and 1%  
98 antibiotics (streptomycin 5 µg/ml and penicillin 5 U/ml). Transfection was performed with 2 µg  
99 Lipofectamine 2000 (Invitrogen) and 0.8 µg of the DNA construct per well in 24-well plates for 4  
100 hours in Opti-MEM medium without antibiotics. After 4 hours of transfection, the cells were  
101 washed with serum-free medium and fed with complete DMEM medium. The cells recovered for  
102 16–18 hours before fixation.

103

#### 104 *Immunofluorescence*

105 Embryos were fixed in PBS/paraformaldehyde 4% for 30 minutes and cryoprotected with  
106 20% sucrose overnight at 4°C and embedded in an OCT-20% sucrose mixture (1:1) prior to  
107 sectioning in cryostat at 10 µm. We sectioned the trunk region of the embryo between the limb  
108 buds. The slides were dried for 30 minutes at 37°C, fixed in PBS/paraformaldehyde 4% for 20

109 minutes, washed three times of 10 minutes with PBS and blocked for 1 hour with 3% NGS and  
110 1% BSA diluted in PBST (PBS containing 0,1% Triton X-100), followed by incubation with  
111 antibodies. Coverslips containing transfected HEK293T cells were washed once with PBS for 10  
112 minutes and then fixed in PBS/paraformaldehyde 4% for 20 minutes. Next, the coverslips were  
113 washed with PBS and incubated with blocking solution (PBS containing 0,1% Triton X-100 and  
114 3% NGS), followed by incubation with antibodies. Primary antibodies were diluted in the block  
115 solution and applied on sections or cells overnight at room temperature in a humidified chamber.  
116 In the next day, the slides or coverslips were washed with PBS and then incubated with the  
117 secondary antibody for 2 hours at room temperature. DAPI was added to the secondary antibody  
118 solution for nuclear staining. Primary antibodies used were: anti-MYC (0,004 mg/ml – 9E10, Life  
119 Technologies), anti-GFP (0.002 mg/ml - A-11122, Life Technologies), anti-FLAG (1:250 - F3165,  
120 Sigma). Secondary antibodies used were goat anti-rabbit IgG Alexa Fluor 488 (1:500, Molecular  
121 Probes) and anti-mouse IgG Alexa Fluor 568 (1:500, Molecular Probes) or 647 (1:500, Molecular  
122 Probes).

### 123 *Luciferase assay*

124 For these experiments, we inserted four E-Box sequences (CAACAGGTG) in *tandem* into  
125 pGL3Luc vector (Promega), generating the plasmid-test pGL3-4xE-box. This plasmid is used to  
126 indirectly measure the transcriptional activity of Scrt2 through the activity of luciferase. To  
127 perform the assay, HEK293T cells were dissociated and plated in 24-well plates at the  
128 concentration of  $1.25 \times 10^5$  cells/well. The cells were transiently co-transfected with each plasmid  
129 containing the tested constructs together with pGL3-4xE-box and pRL encoding the renilla  
130 luciferase. Renilla luciferase is transcribed independently of Scrt2 and served as a normalization

131 factor for the assay. Control conditions were the same, except that the tested construct (pMES or  
132 pCIG) did not contain cScrt2 or its variants.

133 The co-transfection was performed with Lipofectamine 2000 (Invitrogen) at a final  
134 concentration of 2 µg, 0.4 µg of tested plasmids, 0.01 µg of pRL and 0,4 µg pGL3-4xE-box for 4  
135 hours in Opti-MEM medium. After 4 hours, the medium containing the transfection solution was  
136 removed, the cells were washed with serum-free medium and cultured with complete medium. The  
137 cells were re-incubated for 16-18 hours before collection and luciferase signal was measured  
138 following the kit manufacturer's instructions (Dual luciferase assay reporter system, Promega).  
139 Statistical analysis was performed using one-way ANOVA. The level of significance adopted was  
140  $p < 0.05$ .

141

## 142 Results

### 143 *The zinc-finger domain of Scrt2 determines subcellular localization*

144 The main activity reported for members of the Snail superfamily is transcriptional  
145 repression. This is due to the joint effect of the zinc-finger domain, mediating nuclear translocation  
146 and DNA-binding activity, and the SNAG domain, mediating the repressor activity [12]. To  
147 investigate the role of the zinc-finger domain in Scrt2 nuclear localization, we expressed a series  
148 of truncated chicken Scrt2 proteins that included or excluded the zinc-fingers, as well as the  
149 conserved domains SNAG and SCRATCH, in different combinations (Fig. 1A).

150 **Figure 1 - Nuclear localization of chicken Scrt2 depends on the zinc-finger domain while the**  
151 **transcriptional repression activity is regulated by SNAG domain.** (A) Diagram on the left represents  
152 chicken Scrt2 full length protein (amino acids 1-276). The different domains are represented with a color  
153 code: the SNAG domain (1 to 9 aminoacids) in red, the SCRATCH domain (97 to 116 aminoacids) in

154 green, and the five zinc fingers, comprising the DNA binding domain, in yellow. MYC-tag and FLAG-tag  
155 are represented in magenta and blue, respectively. *cScrt2*WT corresponds to the full sequence, with a MYC-  
156 tag at the N-terminal region. Below *cScrt2*WT are represented, in order, the diagrams for *cScrt2*ΔZnF  
157 (amino acids 1 to 127), *cScrt2*ΔN (amino acids 124 to 276), *cScrt2*ΔSCRATCH (deletion of amino acids  
158 97-116) and *cScrt2*ΔSNAG (amino acids 10 to 276). Co-localization with nuclear GFP and DAPI indicates  
159 that expression of *cScrt2*WT (B-D), *cScrt2*ΔN (H-J), *cScrt2*ΔSCRATCH (K-M), and *cScrt2*ΔSNAG (N-P)  
160 localize to the nucleus in HEK293T. In contrast, *cScrt2*ΔZnF expression is restricted to the cytoplasm (E-  
161 G, arrows). (B) Whereas *cScrt2*WT reduced transcription factor-activated luciferase activity relative to  
162 control conditions, removal of SNAG (*cScrt2*ΔSNAG) induced luciferase activity to levels similar to  
163 control, suggesting that the absence of SNAG decreases chicken Scrt2-mediated transcriptional repression.  
164 In contrast, chicken Scrt2 lacking the SCRATCH domain (*cScrt2*ΔSCRATCH) repressed transcription with  
165 the same efficiency as *cScrt2*WT. In control conditions, HEK293T cells were transfected with pGL3-4xRE-  
166 box and empty pCIG vector. *cScrt2*WT, *cScrt2*ΔZnF, *cScrt2*ΔSCRATCH and *cScrt2*ΔSNAG are inserted  
167 into pCIG vector while *cScrt2*ΔN is inserted into pMES vector. Results show the scatter plot distribution  
168 of at least triplicate samples from three different experiments, +/- standard deviation. The data was analyzed  
169 by one-way ANOVA. \*p<0.0001 \*\*p=0.0007 \*\*\*p=0.02. Scale bar: 20μm

170 *cScrt2*ΔZnF, lacking the zinc-finger but including the SNAG and SCRATCH domains, was  
171 found only in the cytoplasm (Fig. 1E-G, arrows) of transfected HEK293T. In contrast, all the  
172 truncations that included the zinc-finger domain, that is, Scrt2 lacking either the SNAG  
173 (*cScrt2*ΔSNAG) or SCRATCH (*cScrt2*ΔSCRATCH) domains or containing only the zinc-finger  
174 motif (*cScrt2*ΔN), segregated to the nuclei of HEK293T cells (Fig. 1H-P).

175 As reliable Scrt2-reactive antibodies are lacking, we used epitope-tagged Scrt2 for these  
176 experiments, first assessing if the presence of the epitope tag affected Scrt2 subcellular  
177 localization. Consistent with its reported role as a DNA-binding transcription factor, MYC-tagged



178 Scrt2 co-localized with the nuclear DAPI stain in HEK293T cells and in embryonic neural cells  
179 (Fig. 1B-D and Fig. S1).

180

181 ***Scrt2 repressor activity requires the conserved SNAG domain but not the SCRATCH domain***

182 In most members of the Snail superfamily, transcriptional repressor activity requires the  
183 conserved amino-terminus SNAG domain (Fig. 2) [13]. Accordingly, removing the SNAG domain  
184 (*cScrt2* $\Delta$ SNAG) decreased Scrt2-mediated transcriptional repression significantly (Fig. 1Q),  
185 without affecting its nuclear localization (Fig. 1O).

186 **Figure 2 - Chicken Scrt2 has conserved amino acid domains.** Top diagram represents full length chicken  
187 Scrt2 with its protein domains. Chicken Scrt2 sequence conservation was analyzed in a variety of  
188 organisms with Ugene and ClustalW programs. Deeper hues reflect higher degree of conservation. SNAG  
189 (red box), HINGE (black box) and SCRATCH (green box) domains display high degree of conservation.  
190 The HINGE domain displays a strongly conserved sequence (EEYSDPESPQS, amino acids 75-85 – black  
191 box) before the SCRATCH domain, suggesting that this region might be important for chicken Scrt2  
192 function. Accession numbers for the sequences used are in Fig. S2B. Python and Baiji sequences are partial.

193 Besides the SNAG and zinc-finger domains, additional domains are conserved in different  
194 branches of the Snail superfamily and are used for their phylogenetic classification. In particular,  
195 the majority of the members of the ScratchB [21] branch of the Scratch family have the SCRATCH  
196 domain. Here, we consider the SCRATCH domain as the full AVTDSYSMDAFFITDGRSRR  
197 sequence (aminoacids 97-116 in chicken Scrt2, Fig. 2). This domain lies between the SNAG and  
198 zinc-fingers domains, and its function remains unknown [21]. As SCRATCH was not required for  
199 Scrt2 nuclear localization (Fig. 1), we next evaluated the effect of removal of SCRATCH domain  
200 on transcriptional repressor activity. The truncated form *cScrt2* $\Delta$ SCRATCH displayed

201 transcriptional repression similar to the native form *cScrt2*WT, suggesting that SCRATCH is  
202 required neither for nuclear localization nor for repressor activity (Fig. 1Q).

203 ***HINGE domain Ser and Tyr residues are required for Scrt2 repressor activity.***

204 To further investigate the role of the SCRATCH domain, we analyzed its evolution in the  
205 context of Scrt2 proteins through sequence alignment (Fig. 2). We observed that the full  
206 SCRATCH domain co-evolved in vertebrates together with another conserved domain that we  
207 named HINGE (amino acids 75-85 in chicken Scrt2; Fig. S2A). HINGE is extremely well  
208 conserved in amniotes and contains an initial acidic-rich motif EEYSD. The acidic residues of the  
209 motif can vary between glutamate and aspartate, but the core residues Tyrosine<sub>77</sub> (Y77) and  
210 Serine<sub>78</sub> (S78) are maintained in most vertebrates – except fish. Furthermore, these two residues  
211 are potentially recognized by a variety of kinases (Fig. S3). As changes in phosphorylation levels  
212 modulate protein stability and repressor activity of Snail1/2 [22], we hypothesized that these  
213 residues are evolutionarily conserved due to their ability to modulate Scrt2 function through  
214 phosphorylation.

215 To test this hypothesis, we generated a series of single mutants at residues 77 and 78 to  
216 simulate the changes in residue charges prior and after phosphorylation. We replaced the original  
217 amino acids either with the neutral residues closest in structure to tyrosine or serine, or with acidic  
218 residues. Thus, Y77 was replaced with phenylalanine (*cScrt2*-Y77F) or glutamate (*cScrt*-Y77E)  
219 and S78 with alanine (*cScrt*-S78A) or aspartate (*cScrt2*-S78D). All four single mutations impaired  
220 Scrt2-mediated transcriptional repression (Fig. 3M).

221 **Figure 3 - Mutations in residues Y77 or S78 do not alter the subcellular localization of Scrt2 but**  
222 **reduce the transcriptional repression activity.** FLAG-tagged *cScrt2*-Y77F (A-C), *cScrt2*-Y77E (D-F),  
223 *cScrt2*-S78A (G-I) and *cScrt2*-S78D (J-L) remain in the nucleus of HEK293T cells after transfection. FLAG  
224 immunostaining co-localizes with nuclear GFP and DAPI. *cScrt2*-Y77F, *cScrt2*-Y77E, *cScrt2*-S78A were

225 inserted in a pCIG vector whereas *cScrt2*-S78D was inserted in a pMES vector. (M) The single mutant  
226 forms *cScrt2*-Y77F, *cScrt2*-Y77E, *cScrt2*-S78A and *cScrt2*-S78D have reduced transcriptional repression  
227 activity compared to *cScrt2*WT (\*\*), although the remaining activity is sufficient to produce a significant  
228 reduction in luciferase signal when compared to control (\*). Results shown are the mean of 3 independent  
229 experiments performed on triplicate samples. The data were analyzed with one-way ANOVA non-  
230 parametric pairwise comparison and are represented as mean with standard deviation. \* p<0.001; \*\*  
231 p=0.047; \*\*\* p=0.0164; @ p=0.04; # p= 0.006. Scale bar: 20µm

232 Reduction of transcriptional activity could not be attributed to changes in Scrt subcellular  
233 localization, as all constructs were found in the nucleus (Fig. 3B, E, H and K). Moreover, these  
234 mutations did not change protein expression levels (data not shown).

235 As our homology analysis suggested a co-evolution of the HINGE and SCRATCH domains,  
236 we hypothesized that the two domains act together, which would mean that removing the  
237 SCRATCH domain in the background of Y77 or S78 single mutants should further decrease Scrt-2  
238 repressor activity. Contrary to our hypothesis, removal of the SCRATCH domain restored the  
239 repressor activity of *cScrt2*-Y77F and *cScrt*-S78A (Fig. 4).

240 **Figure 4 - Mutation of Y77 or S78 does not reduce transcriptional repressor activity in the absence**  
241 **of SCRATCH domain.** Mutation of the Y77 or of the S78 residues in the absence of the SCRATCH  
242 domain (YFΔSCRATCH or SAΔSCRATCH) does not alter the chicken Scrt2 transcriptional repression  
243 activity. Results shown are the mean of 5 independent experiments performed on triplicate samples.  
244 Statistical significance was calculated using one-way ANOVA multiple comparisons. \*p<0.0001;  
245 \*\*p=0.02; #p=0.0001; @p=0.0009.

246

#### 247 ***Double mutants of the HINGE domain repress transcription***

248 Considering that single mutations of either Y77 or S78 decreased Scrt2 repressor activity  
249 and that invertebrates lack the entire HINGE domain (Fig. 2), we next tested the effect of

250 simultaneously mutating both sites in Scrt2 (*cScrt2*-YS/FA and *cScrt2*-YS/ED). These double  
251 mutants did not differ significantly from wild type Scrt2 in their ability to repress transcription  
252 (Fig. 5A).

253 **Figure 5 - Simultaneous mutations in residues Y77 and S78 do not affect chicken Scrt2 activity.**

254 Transcriptional repression activity of the double mutant forms, *cScrt2*-YS/FA and *cScrt2*-YS/ED is similar  
255 to *cScrt2*WT (A). Removal of the SNAG domain (YS/FA $\Delta$ SNAG) partially reduces the repressor activity  
256 of the double mutant form *cScrt2*-YS/FA (B). Results shown are the mean of 3 independent experiments,  
257 performed on triplicate samples. Statistical significance was calculated using 1-way ANOVA. \* $p < 0.0001$ ;  
258 \*\* $p = 0.02$

259 Considering the importance of the conserved SNAG domain in transcriptional repression,  
260 we next asked if the double mutants also repressed transcription through this domain. Indeed, when  
261 we compared the repressor activity of the double mutant (*cScrt2*-YS/FA) in the presence or  
262 absence of the SNAG domain ( $\Delta$ SNAG), the absence of SNAG partially decreased repressor  
263 activity in the double mutant (Fig. 5B).

264

265 **Discussion**

266 We have dissected here the contributions of evolutionarily conserved domains in Scrt2  
267 towards its transcriptional repression activity. In particular, we focused on the importance of the  
268 SNAG and SCRATCH domain and identified a novel conserved region called HINGE. Removal  
269 of SNAG and single-residue mutations in HINGE domain downregulated transcriptional  
270 repression.

271 Extensive phylogenetic comparison of the SNAG domain in the Snail superfamily suggests  
272 that it can be subdivided into two separate subdomains: SNAG-1 and SNAG-2. SNAG-1 is defined

273 as the small domain of highly conserved residues, also known as the minimal SNAG  
274 (MPRSFLVKK), whereas SNAG-2 contains the subsequent 13-17 amino acids [21]. SNAG-1 and  
275 SNAG-2 do not necessarily occur in the same protein; in other words, the two subdomains can  
276 evolve independently, suggesting that they contribute to different functions. Scratch proteins -  
277 including Sct2- all lack a recognizable SNAG-2 subdomain. However, Sct2 retains a SNAG-1  
278 subdomain identical to that found in Snail1. Our data shows that removal of SNAG-1 decreased  
279 Sct2 repressor activity but not protein stability. In light of this, a more complex picture of SNAG-1  
280 and 2 function arises. The canonical model of SNAG-mediated repression in the Snail superfamily  
281 relies on the functional analysis of Snail1, after simultaneously removing SNAG-1 and 2. In these  
282 experiments, repressor activity was completely abolished, and protein stability reduced [12,13].  
283 Repressor activity has been attributed to the interaction of individual residues in SNAG-1 to  
284 repressor proteins and epigenetic modifiers. For example, Lysine-specific demethylase 1 (LSD1)  
285 interacts with Pro<sub>2</sub> and Arg<sub>3</sub> of Snail's SNAG-1 domain [12,13]. Further, the Ajuba family of LIM  
286 repressor proteins interacts with Phe<sub>4</sub> in SNAG-1 [23]. Together, these data suggest that the  
287 SNAG-1 domain is the minimal domain required for transcriptional repression, whereas SNAG-2  
288 might be more relevant for Snail1 protein stability.

289 We also identified and analyzed the role of another evolutionarily conserved domain  
290 (HINGE), that lies between the SNAG and SCRATCH domains, containing potential  
291 phosphorylatable sites. As phosphorylation of Snail1 and 2 modulate their stability and repressor  
292 activity [22], we explored the importance of these residues for Sct2 function through point  
293 mutations. Our mutations focused in changing the charge of the original residues, substituting them  
294 by the neutral residues alanine and phenylalanine or by the negatively charged residues aspartate  
295 and glutamate: substitution with alanine or phenylalanine generates a non-phosphorylatable form,

296 whereas substitution with aspartate or glutamate simulates the negative charge provided by  
297 phosphorylation [22,24]. Thus, if phosphorylation at these residues modulated Sct2 activity,  
298 negatively charged and neutral charge point mutations should yield opposite results. Instead, all  
299 single point mutations decreased Sct2 transcriptional repressor activity irrespective of the residue  
300 charge, suggesting that the replacement of these amino acids affects Sct2 activity through changes  
301 in protein conformation. Without definitive crystallographic information, our interpretation of the  
302 single and double mutant data is that this region acts as a hinge. Interestingly, double mutants  
303 restored repressor activity, but in a SNAG-dependent manner: with SNAG deleted, double  
304 mutations did not restore transcriptional repression. Thus, the double mutations might have  
305 rearranged protein conformation so as to expose SNAG in a position that allows co-repressor  
306 recruitment.

307 The mutations in the HINGE domain also revealed a putative modulatory role for the  
308 SCRATCH domain on Sct2 function: in single mutations of either residue, 77 or 78 of HINGE,  
309 concomitant removal of the SCRATCH domain restored transcriptional repressive activity.  
310 However, removal of SCRATCH did not affect Sct2 activity in the background of an intact  
311 HINGE domain containing Tyrosine77 and Serine78. Thus, the modulatory activity of SCRATCH  
312 depends on the identity of the residue on position 77 or 78 at the HINGE domain, suggesting that  
313 their function evolved in concert. Indeed, our phylogenetic analysis indicate that the HINGE  
314 domain co-evolved with the SCRATCH domain. Conservation of the SCRATCH domain is higher  
315 amongst species that contain both Tyrosine and a Serine in the HINGE domain (Fig. S2). If true,  
316 the salmon and zebrafish Sct2 orthologues, which present the Tyrosine but not the Serine residue  
317 in the HINGE domain (EEYCD), might present a conformation where SCRATCH is constitutively  
318 modulating transcriptional repression, and thus would present a lower activity than their avian or

319 mammalian counterparts. In the case of these latter species, which have fully conserved HINGE  
320 domains, post-translational modifications in HINGE could change its conformation so as to  
321 activate the modulatory role of SCRATCH. In this scenario, addition of a single negative charge,  
322 possibly through phosphorylation at position 77 or 78, would be sufficient to activate SCRATCH-  
323 domain-mediated reduction of Sct2 transcriptional repression. Although our data shows that  
324 changing residue 77 or 78 to a neutral aminoacid has the same effect as a substitution for a  
325 negatively-charged one, we cannot rule out the possibility that experimental substitutions of  
326 aminoacid residues fail to completely reproduce the changes triggered by phosphorylation.

327 Finally, we also investigated the role of the zinc-finger domain in nuclear translocation. The  
328 chicken Sct2 zinc-finger domain has 61.47% identity to the homologous region in mouse Snail1  
329 and was sufficient to promote nuclear localization Sct2. The nuclear shuttling function of mouse  
330 Snail1 is attributed to importin binding to six basic and six hydrophobic residues [25]. Although  
331 the zinc-finger domain in Sct2 contains all the six importin-binding hydrophobic residues, it lacks  
332 one of the importin-binding basic residues identified in Snail1 (Fig. S4), indicating that  
333 conservation of five of the basic residues is sufficient for nuclear localization. Also, the zinc-finger  
334 domain is sufficient to direct protein-DNA interaction at E-box motifs (Fig. S5).

335 Thus, we confirm that Sct2, with a general structure similar to the Snail family members,  
336 relies on SNAG for transcriptional repression and the zinc-finger domain for nuclear translocation  
337 and DNA-binding. We also show that Sct2 has additional domains that modulate transcriptional  
338 repression. Together, our data extends current knowledge on the modular structure of Snail  
339 superfamily members and provides support for the hypothesis that modularity in this superfamily  
340 arose from duplication and divergence from a common ancestral protein.

## 342 **Acknowledgements**

343

344 The authors thank Dr. Paulo Sérgio Lopes Oliveira for discussions about protein structure, Dr.  
345 Cristóvão Albuquerque for editing assistance and Dr. Ali Brivanlou for generously sharing lab space and  
346 reagents.

347

## 348 **References**

- 349 1. Barrallo-Gimeno A, Nieto MA. Evolutionary history of the Snail/Scratch superfamily.  
350 Trends Genet. 2009;25: 248–252. doi:10.1016/j.tig.2009.04.001
- 351 2. Rembold M, Ciglar L, Yáñez-Cuna JO, Zinzen RP, Girardot C, Jain A, et al. A conserved  
352 role for Snail as a potentiator of active transcription. Genes Dev. 2014;28: 167–81.  
353 doi:10.1101/gad.230953.113
- 354 3. Reece-Hoyes JS, Deplancke B, Barrasa MI, Hatzold J, Smit RB, Arda HE, et al. The *C.*  
355 *elegans* Snail homolog CES-1 can activate gene expression in vivo and share targets with  
356 bHLH transcription factors. Nucleic Acids Res. 2009;37: 3689–98.  
357 doi:10.1093/nar/gkp232
- 358 4. Nakakura EK, Watkins DN, Schuebel KE, Sriuranpong V, Borges MW, Nelkin BD, et al.  
359 Mammalian Scratch: a neural-specific Snail family transcriptional repressor. Proc Natl  
360 Acad Sci U S A. 2001;98: 4010–5. doi:10.1073/pnas.051014098
- 361 5. Metzstein MM, Horvitz HR. The *C. elegans* cell death specification gene *ces-1* encodes a  
362 snail family zinc finger protein. Mol Cell. 1999;4: 309–19.
- 363 6. Roark M, Sturtevant M a, Emery J, Vaessin H, Grell E, Bier E. Scratch, a Pan-Neural  
364 Gene Encoding a Zinc Finger Protein Related To Snail, Promotes Neuronal Development.



- 365 Genes Dev. 1995;9: 2384–2398. doi:10.1101/gad.9.19.2384
- 366 7. Barrallo-Gimeno A, Nieto MA. The Snail genes as inducers of cell movement and  
367 survival: implications in development and cancer. *Development*. 2005;132: 3151–3161.  
368 doi:10.1242/dev.01907
- 369 8. Itoh Y, Moriyama Y, Hasegawa T, Endo T a, Toyoda T, Gotoh Y. Scratch regulates  
370 neuronal migration onset via an epithelial-mesenchymal transition-like mechanism. *Nat*  
371 *Neurosci*. Nature Publishing Group; 2013;16: 416–25. doi:10.1038/nn.3336
- 372 9. Paul V, Tonchev AB, Henningfeld K a., Pavlakis E, Rust B, Pieler T, et al. Scratch2  
373 Modulates Neurogenesis and Cell Migration Through Antagonism of bHLH Proteins in  
374 the Developing Neocortex. *Cereb Cortex*. 2012;24: 754–72. doi:10.1093/cercor/bhs356
- 375 10. Rodríguez-Aznar E, Nieto M a. Repression of Puma by scratch2 is required for neuronal  
376 survival during embryonic development. *Cell Death Differ*. 2011;18: 1196–207.  
377 doi:10.1038/cdd.2010.190
- 378 11. Hemavathy K, Guru SC, Harris J, Chen JD, Ip YT. Human Slug is a repressor that  
379 localizes to sites of active transcription. *Mol Cell Biol*. 2000;20: 5087–95.  
380 doi:10.1128/MCB.20.14.5087-5095.2000
- 381 12. Lin Y, Wu Y, Li J, Dong C, Ye X, Chi YI, et al. The SNAG domain of Snail1 functions as  
382 a molecular hook for recruiting lysine-specific demethylase 1. *EMBO J*. Nature  
383 Publishing Group; 2010;29: 1803–16. doi:10.1038/emboj.2010.63
- 384 13. Molina-Ortiz P, Villarejo A, MacPherson M, Santos V, Montes A, Souchelnytskyi S, et al.  
385 Characterization of the SNAG and SLUG domains of Snail2 in the repression of E-  
386 cadherin and EMT induction: modulation by serine 4 phosphorylation. *PLoS One*. 2012;7:  
387 e36132. doi:10.1371/journal.pone.0036132

- 388 14. Nibu Y, Zhang H, Bajor E, Barolo S, Small S, Levine M. dCtBP mediates transcriptional  
389 repression by Knirps , Kruppel and Snail in the Drosophila embryo. *EMBO J.* 1998;17:  
390 7009–7020.
- 391 15. Nieto MA. The snail superfamily of zinc-finger transcription factors. *Nat Rev Mol Cell*  
392 *Biol.* 2002;3: 155–66. doi:10.1038/nrm757
- 393 16. Vieceli FM, Simões-Costa M, Turri JA, Kanno T, Bronner M, Yan CYI. The transcription  
394 factor chicken Scratch2 is expressed in a subset of early postmitotic neural progenitors.  
395 *Gene Expr patterns.* Elsevier B.V.; 2013;13: 189–196. doi:10.1016/j.gep.2013.03.004
- 396 17. Chen YX, Krull CE, Reneker LW. Targeted gene expression in the chicken eye by in ovo  
397 electroporation. *Mol Vis.* 2004;10: 874–83.
- 398 18. Megason SG, McMahon AP. A mitogen gradient of dorsal midline Wnts organizes growth  
399 in the CNS. *Development.* 2002;2098: 2087–2098.
- 400 19. Hamburger V, Hamilton HL. A series of normal stages in the development of the chick  
401 embryo. *Dev Dyn.* 1951;88: 49–92. doi:10.1002/aja.1001950404
- 402 20. Itasaki N, Bel-Vialar S, Krumlauf R. “Shocking” developments in chick embryology:  
403 Electroporation and in ovo gene expression. *Nat Cell Biol.* 1999;1: 203–207.  
404 doi:10.1038/70231
- 405 21. Kerner P, Hung J, Béhague J, Le Gouar M, Balavoine G, Vervoort M. Insights into the  
406 evolution of the snail superfamily from metazoan wide molecular phylogenies and  
407 expression data in annelids. *BMC Evol Biol.* 2009;9: 94. doi:10.1186/1471-2148-9-94
- 408 22. Domínguez D, Montserrat-sentís B, Guaita S, Grueso J, Puig I, Baulida J, et al.  
409 Phosphorylation Regulates the Subcellular Location and Activity of the Snail  
410 Transcriptional Repressor. *Mol Cell Biol.* 2003;23: 5078–5089.

- 411 doi:10.1128/MCB.23.14.5078
- 412 23. Ayyanathan K, Peng H, Hou Z, Goyal RK, Langer EM, Longmore GD, et al. The Ajuba  
413 LIM domain protein is a corepressor for SNAG domain mediated repression and  
414 participates in nucleocytoplasmic Shuttling. *Cancer Res.* 2007;67: 9097–106.  
415 doi:10.1158/0008-5472.CAN-07-2987
- 416 24. MacPherson MR, Molina P, Souchelnytskyi S, Wernstedt C, Martin-Pérez J, Portillo F, et  
417 al. Phosphorylation of Serine 11 and Serine 92 as New Positive Regulators of Human  
418 Snail1 Function: Potential Involvement of Casein Kinase-2 and the cAMP-activated  
419 Kinase Protein Kinase A. *Mol Biol Cell.* 2010;21: 244–253. doi:10.1091/mbc.E09
- 420 25. Mingot JM, Vega S, Maestro B, Sanz JM, Nieto MA. Characterization of Snail nuclear  
421 import pathways as representatives of C2H2 zinc finger transcription factors. *J Cell Sci.*  
422 2009;122: 1452–1460. doi:10.1242/jcs.041749

423

## 424 **Supporting information**

425 Supplementary figure 1

426 **Chicken Scrt2 localizes to the nucleus in chick neural tube cells.** Immunostaining of neural tube sections  
427 show presence of MYC or FLAG tags in the nucleus 24 hours after electroporation with MYC-tagged  
428 *cScrt2*WT (B) or FLAG-tagged *cScrt2*-Y77E (E) and *cScrt2*-S78A (H). MYC (B) and FLAG (E-H) signal  
429 co-localizes with GFP (A, D, G) and DAPI (C, F, I). C', F' and I' are a higher magnification of the overlap  
430 image in the dotted area in B, E and H. Vector reporter GFP labels the electroporated cells. Scale bar - 50  
431  $\mu\text{m}$ .

432 Supplementary figure 2

433 **HINGE and SCRATCH domains co-evolved in vertebrates and were both modified in fish.** (A) The  
434 HINGE-SCRATCH region of different species was aligned to compare the changes in both domains

435 simultaneously. Conservation of the SCRATCH domain is higher amongst species that contain both  
436 Tyrosine and a Serine in the HINGE domain. (B) Full length SCRT2 amino acid sequences were  
437 aligned in CLUSTALX and the resulting N-J tree rooted with the wasp SCRT2 sequence. Python and Baiji  
438 sequences were partial and lacked the SNAG domain.

439 Supplementary figure 3

440 **Scrt2 has potentially phosphorylated residues.** *In silico* analysis of the chicken Scrt2 sequence using the  
441 online phosphorylation prediction site KinasePhos identified residues Y77, S78 and S82 as possible targets  
442 for phosphorylation. Below are candidate kinases for these phosphorylation sites. The box outlined in  
443 dashed light blue lines shows the Scrt2-specific domain (aa 75-85 in chicken Scrt2).

444 Supplementary figure 4

445 **Alignment of the zinc-finger domains of selected members of the Snail superfamily.** ClustalW  
446 alignment of the region containing zinc-fingers 2-4 of Snail and Scratch orthologues is shown here. The  
447 residues that interact with importin are highlighted with different colors: basic residues are red and  
448 hydrophobic residues are green. The labels are preceded by the species; h: human, m: mouse, c: chicken, d:  
449 Drosophila. Sequences used were hSnail1 (NP\_005976.2), hSnail2 (NP\_003059.1), hScratch1  
450 (NP\_112599.2), hScrt2 (NP\_149120.1), mSnail1 (NP\_035557.1), mSnail2 (NP\_035545.1), mScratch1  
451 (NP\_570963.1), mScrt2 (NP\_001153882.1), cSnail1 (NP\_990473.1), cSnail2 (CAA54679.1), cScrt2  
452 (AEW43643.1), dSnail (NP\_476732.1), dScratch (AAD38602.1).

453 Supplementary figure 5

454 **Chicken Sctr2 represses transcription driven by E-box.** HEK293T cells were transfected with pGL3-  
455 4xE-box and empty pMES plasmid (Control), or full length Scrt2 (*cScrt2*WT) or Scrt2 zinc-fingers fused  
456 to the repressor domain of Engrailed (EN-*Scrt2*) or to the VP16 activator domain (VP16-*Scrt2*). VP16-  
457 *Scrt2* strongly enhanced transcriptional activity (t-test,  $p < 0.001$ ) while *cScrt2*WT reduced transcription  
458 below the basal levels (t-test,  $p < 0.05$ ); EN-Scrt2-mediated reduction was not significantly different from  
459 *cScrt2*WT.



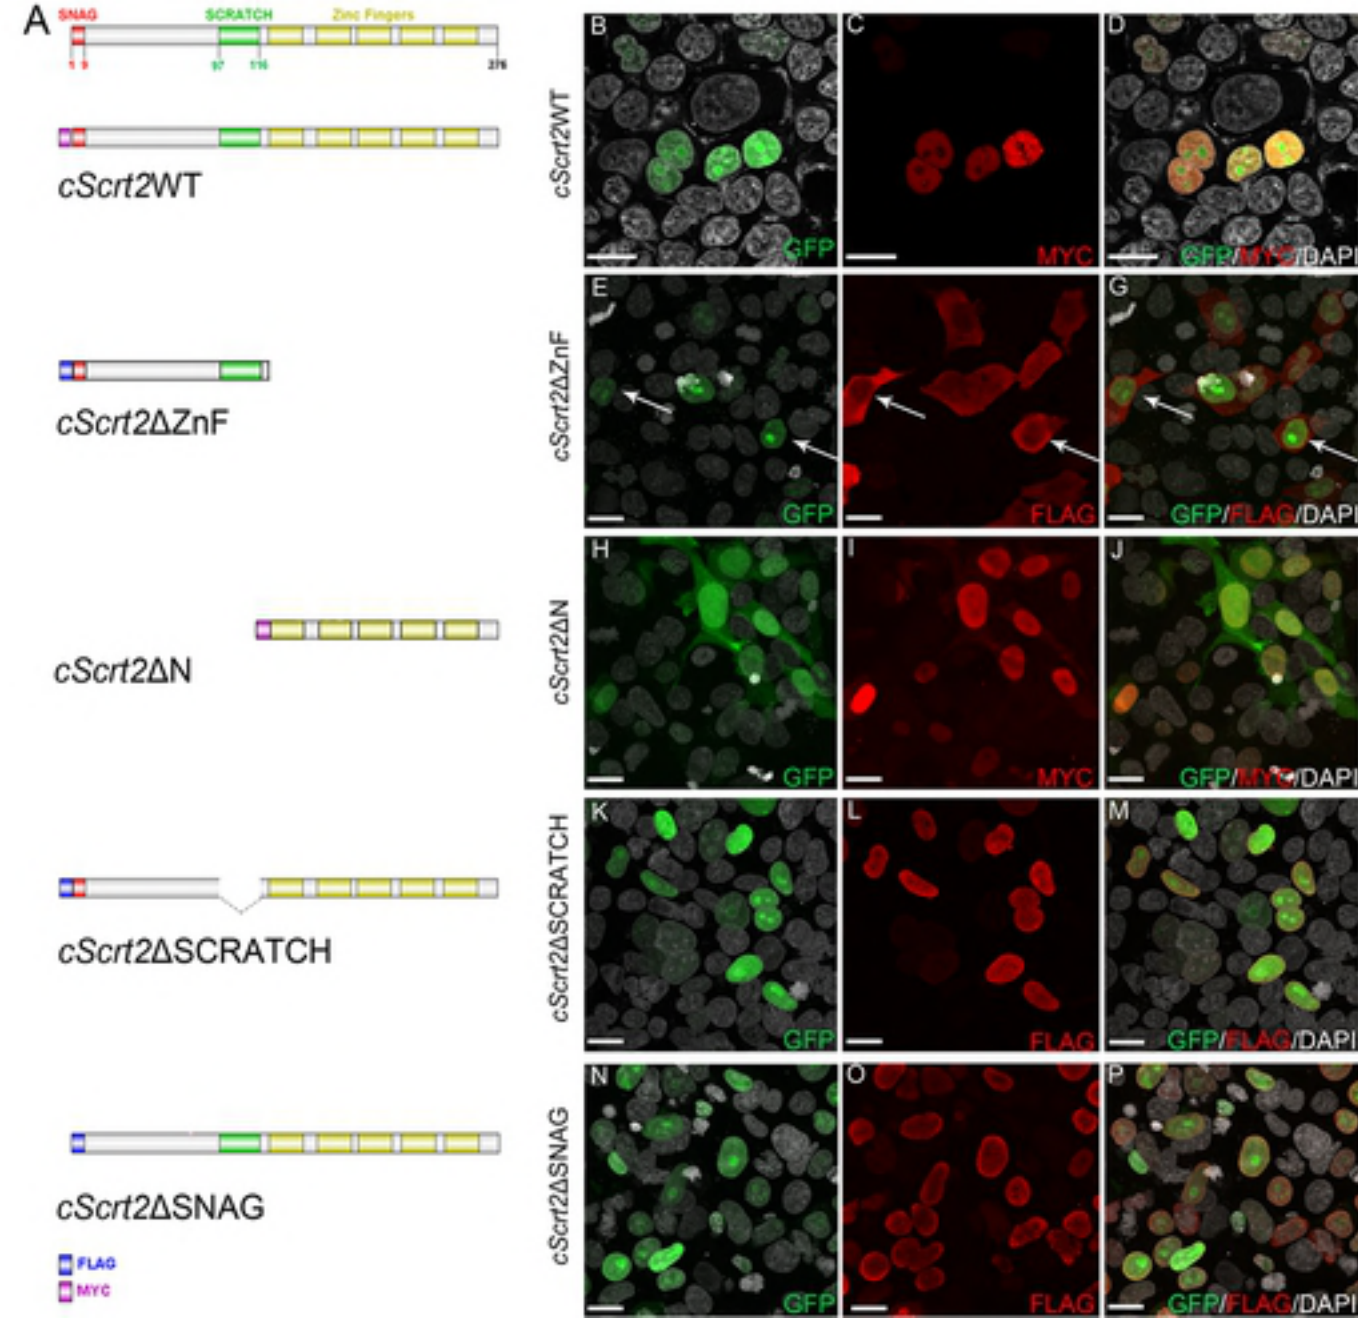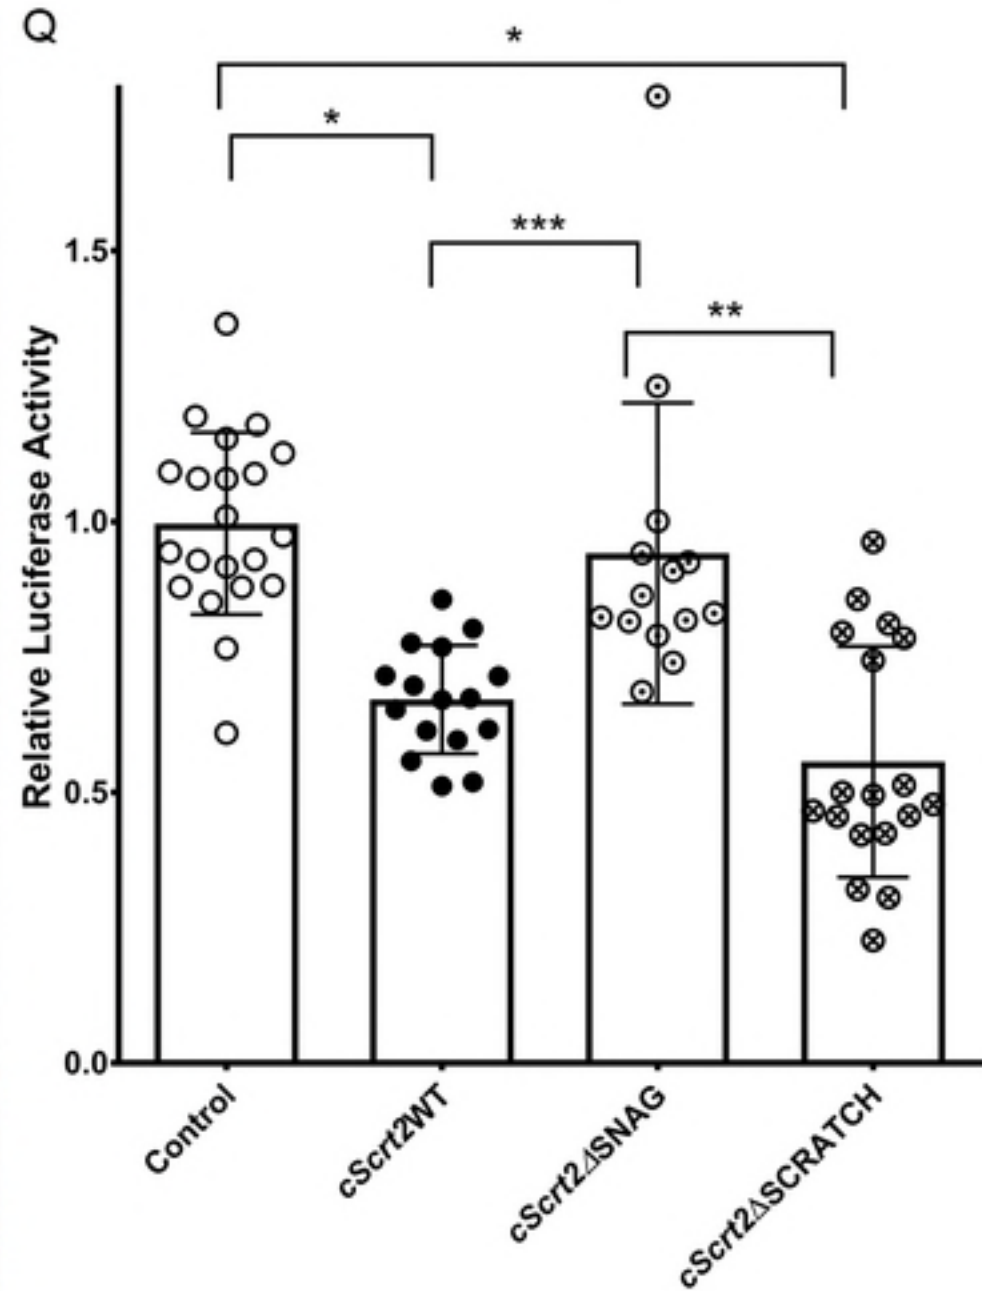



# Chicken SCRATCH2

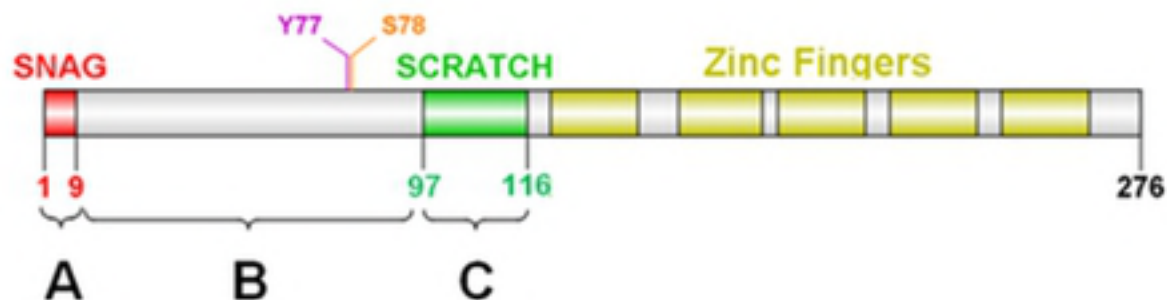

## SNAG

|                     |   |   |   |   |   |   |   |   |   |
|---------------------|---|---|---|---|---|---|---|---|---|
| <i>Wasp</i>         | M | P | R | A | F | L | I | T | R |
| <i>Brachiopod</i>   | M | P | R | S | F | L | V | K | K |
| <i>Limpet</i>       | M | P | K | S | F | L | V | K | K |
| <i>Polychaete</i>   | M | P | R | S | F | L | V | K | K |
| <i>Amphioxus</i>    | M | P | R | S | F | L | V | K | K |
| <i>Sea Urchin</i>   | M | P | R | S | F | L | V | K | K |
| <i>Frog</i>         | M | P | R | S | F | L | V | K | K |
| <i>Tibetan Frog</i> | M | P | R | S | F | L | V | K | K |
| <i>Zebrafish</i>    | M | P | R | S | F | L | V | K | K |
| <i>Salmon</i>       | M | P | R | S | F | L | V | K | K |
| <i>Python</i>       | - | - | - | - | - | - | - | - | - |
| <i>Mouse</i>        | M | P | R | S | F | L | V | K | K |
| <i>Human</i>        | M | P | R | S | F | L | V | K | K |
| <i>Chimpanzee</i>   | M | P | R | S | F | L | V | K | K |
| <i>Dolphin</i>      | - | - | - | - | - | - | - | - | - |
| <i>Sperm Whale</i>  | M | P | R | S | F | L | V | K | K |
| <i>Baiji</i>        | - | - | - | - | - | - | - | - | - |
| <i>Alligator</i>    | M | P | R | S | F | L | V | K | K |
| <i>Turtle</i>       | M | P | R | S | F | L | V | K | K |
| <i>Chick</i>        | M | P | R | R | F | L | V | K | K |

## HINGE

|   |   |   |   |   |   |   |   |   |   |   |   |   |   |   |   |   |   |
|---|---|---|---|---|---|---|---|---|---|---|---|---|---|---|---|---|---|
| A | E | N | Q | Q | - | - | - | - | - | L | H | E | L | K | S |   |   |
| S | G | S | T | A | - | - | - | - | - | - | - | - | - | S | S | H | S |
| G | E | G | E | S | - | - | - | - | - | M | T | S | P | E | S | - | - |
| D | E | D | S | G | - | - | - | - | - | I | E | S | A | T | E | - | - |
| A | T | A | N | D | P | - | - | - | - | P | P | P | L | P | S | - | - |
| T | H | H | E | E | - | - | - | - | - | P | P | S | L | P | S | - | - |
| D | D | Y | S | D | - | - | - | - | - | P | D | S | P | Q | S | - | - |
| D | D | Y | S | E | - | - | - | - | - | P | D | S | P | Q | S | - | - |
| G | E | Y | C | Q | P | D | L | E | H | - | P | D | S | P | Q | S | - |
| E | E | Y | C | D | P | D | L | E | H | - | P | D | S | P | Q | S | - |
| E | D | Y | S | D | - | - | - | - | - | P | E | S | P | Q | S | - | - |
| E | E | Y | S | D | - | - | - | - | - | P | E | S | P | Q | S | - | - |
| E | E | Y | S | D | - | - | - | - | - | P | E | S | P | Q | S | - | - |
| E | E | Y | S | D | - | - | - | - | - | P | E | S | P | Q | S | - | - |
| E | E | Y | S | D | - | - | - | - | - | P | E | S | P | Q | S | - | - |
| E | E | Y | S | D | - | - | - | - | - | P | E | S | P | Q | S | - | - |
| E | E | Y | S | D | - | - | - | - | - | P | E | S | P | Q | S | - | - |
| E | E | Y | S | D | - | - | - | - | - | P | E | S | P | Q | S | - | - |
| E | E | Y | S | D | - | - | - | - | - | P | E | S | P | Q | S | - | - |
| E | E | Y | S | D | - | - | - | - | - | P | E | S | P | Q | S | - | - |

## SCRATCH

|   |   |   |   |   |   |   |   |   |   |   |   |   |   |   |   |   |   |   |   |   |   |   |   |   |   |   |   |   |   |   |   |   |   |   |
|---|---|---|---|---|---|---|---|---|---|---|---|---|---|---|---|---|---|---|---|---|---|---|---|---|---|---|---|---|---|---|---|---|---|---|
| Q | V | R | L | T | V | F | D | - | - | - | - | - | V | L | E | H | D | D | T | S | I | E | Y | S | R | I | G | S | N | R | Q |   |   |   |
| G | V | T | S | D | L | S | L | S | G | - | - | - | T | V | G | Y | T | Y | E | A | F | L | I | T | - | - | D | G | R | S | K | R |   |   |
| E | S | N | S | Q | Y | Q | - | - | - | - | - | - | P | N | H | Y | G | G | F | I | V | V | - | - | - | - | D | G | R | T | K | H |   |   |
| D | V | T | T | E | - | - | - | - | - | - | - | - | - | - | - | - | - | - | - | - | - | - | - | - | - | - | - | D | G | R | A | R | R |   |
| T | V | G | - | - | - | - | - | - | - | - | - | - | - | - | - | Y | I | Q | C | D | A | F | Y | I | T | - | - | - | D | G | R | S | R | R |
| D | V | D | S | G | I | L | S | V | Q | S | K | G | Q | L | F | L | S | Y | E | A | F | L | I | T | - | - | - | D | G | R | S | R | R |   |
| A | V | T | D | S | - | - | - | - | - | - | - | - | - | - | - | Y | S | M | D | A | F | F | I | S | - | - | - | D | G | R | S | R | R |   |
| A | V | T | D | S | - | - | - | - | - | - | - | - | - | - | - | Y | S | I | D | A | F | F | I | T | - | - | - | D | G | R | S | R | R |   |
| S | L | S | E | G | - | - | - | - | - | - | - | - | - | - | - | Y | T | M | D | A | F | F | I | S | - | - | - | D | G | R | S | R | R |   |
| A | P | T | E | G | - | - | - | - | - | - | - | - | - | - | - | Y | T | M | D | A | F | F | I | S | - | - | - | D | G | R | S | R | R |   |
| A | V | T | E | S | - | - | - | - | - | - | - | - | - | - | - | Y | S | M | D | A | F | F | I | - | - | - | - | D | G | R | S | R | R |   |
| A | V | T | D | S | - | - | - | - | - | - | - | - | - | - | - | Y | S | M | D | A | F | F | I | S | - | - | - | D | G | R | S | R | R |   |
| A | V | T | D | S | - | - | - | - | - | - | - | - | - | - | - | Y | S | M | D | A | F | F | I | S | - | - | - | D | G | R | S | R | R |   |
| A | V | T | D | S | - | - | - | - | - | - | - | - | - | - | - | Y | S | M | D | A | F | F | I | S | - | - | - | D | G | R | S | R | R |   |
| A | V | T | D | S | - | - | - | - | - | - | - | - | - | - | - | Y | S | M | D | A | F | F | I | S | - | - | - | D | G | R | S | R | R |   |
| A | V | T | D | S | - | - | - | - | - | - | - | - | - | - | - | Y | S | M | D | A | F | F | I | S | - | - | - | D | G | R | S | R | R |   |
| A | V | T | D | S | - | - | - | - | - | - | - | - | - | - | - | Y | S | M | D | A | F | F | I | S | - | - | - | D | G | R | S | R | R |   |
| A | V | T | D | S | - | - | - | - | - | - | - | - | - | - | - | Y | S | M | D | A | F | F | I | S | - | - | - | D | G | R | S | R | R |   |
| A | V | T | D | S | - | - | - | - | - | - | - | - | - | - | - | Y | S | M | D | A | F | F | I | T | - | - | - | D | G | R | S | R | R |   |
| A | V | T | D | S | - | - | - | - | - | - | - | - | - | - | - | Y | S | M | D | A | F | F | I | T | - | - | - | D | G | R | S | R | R |   |

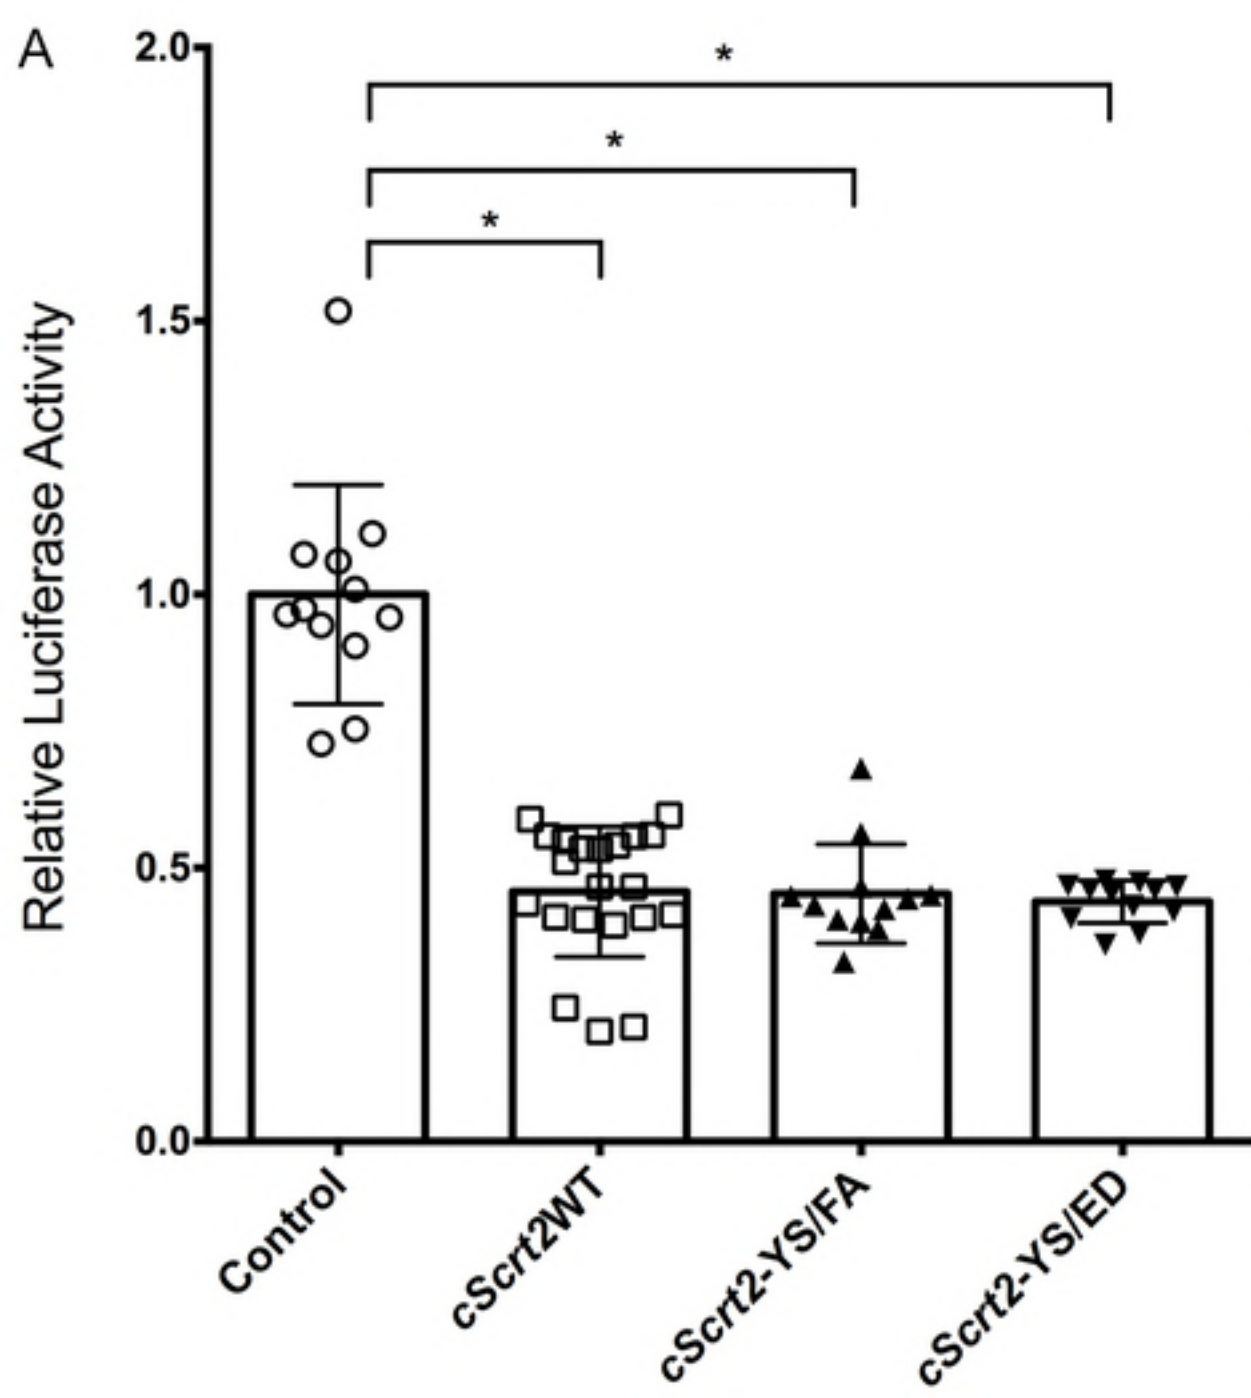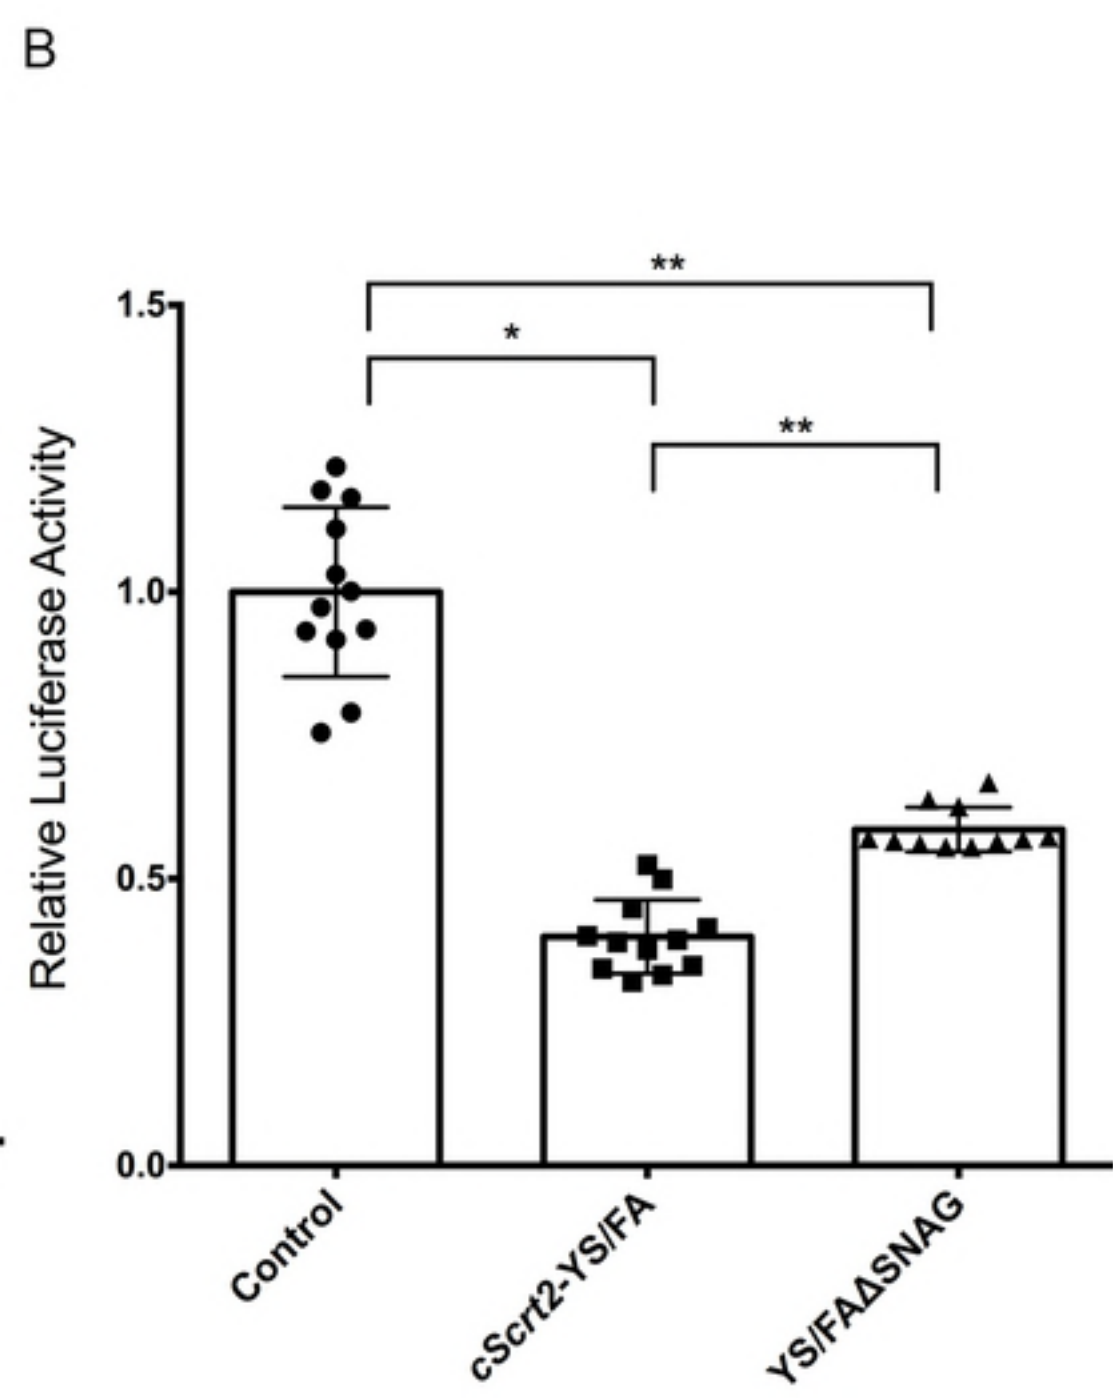



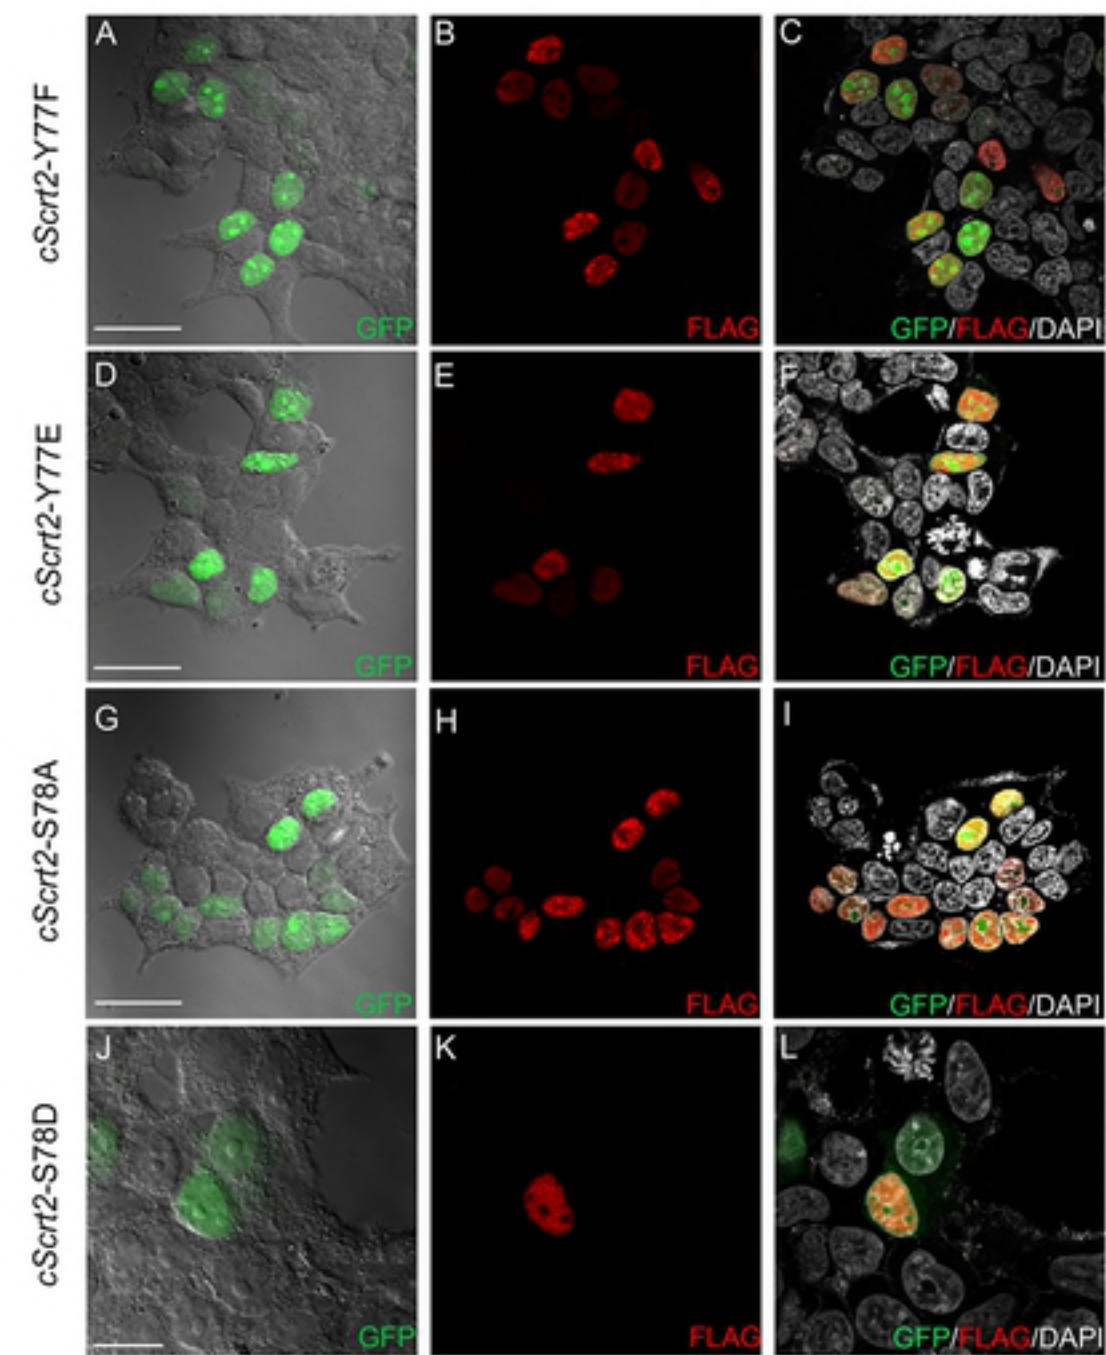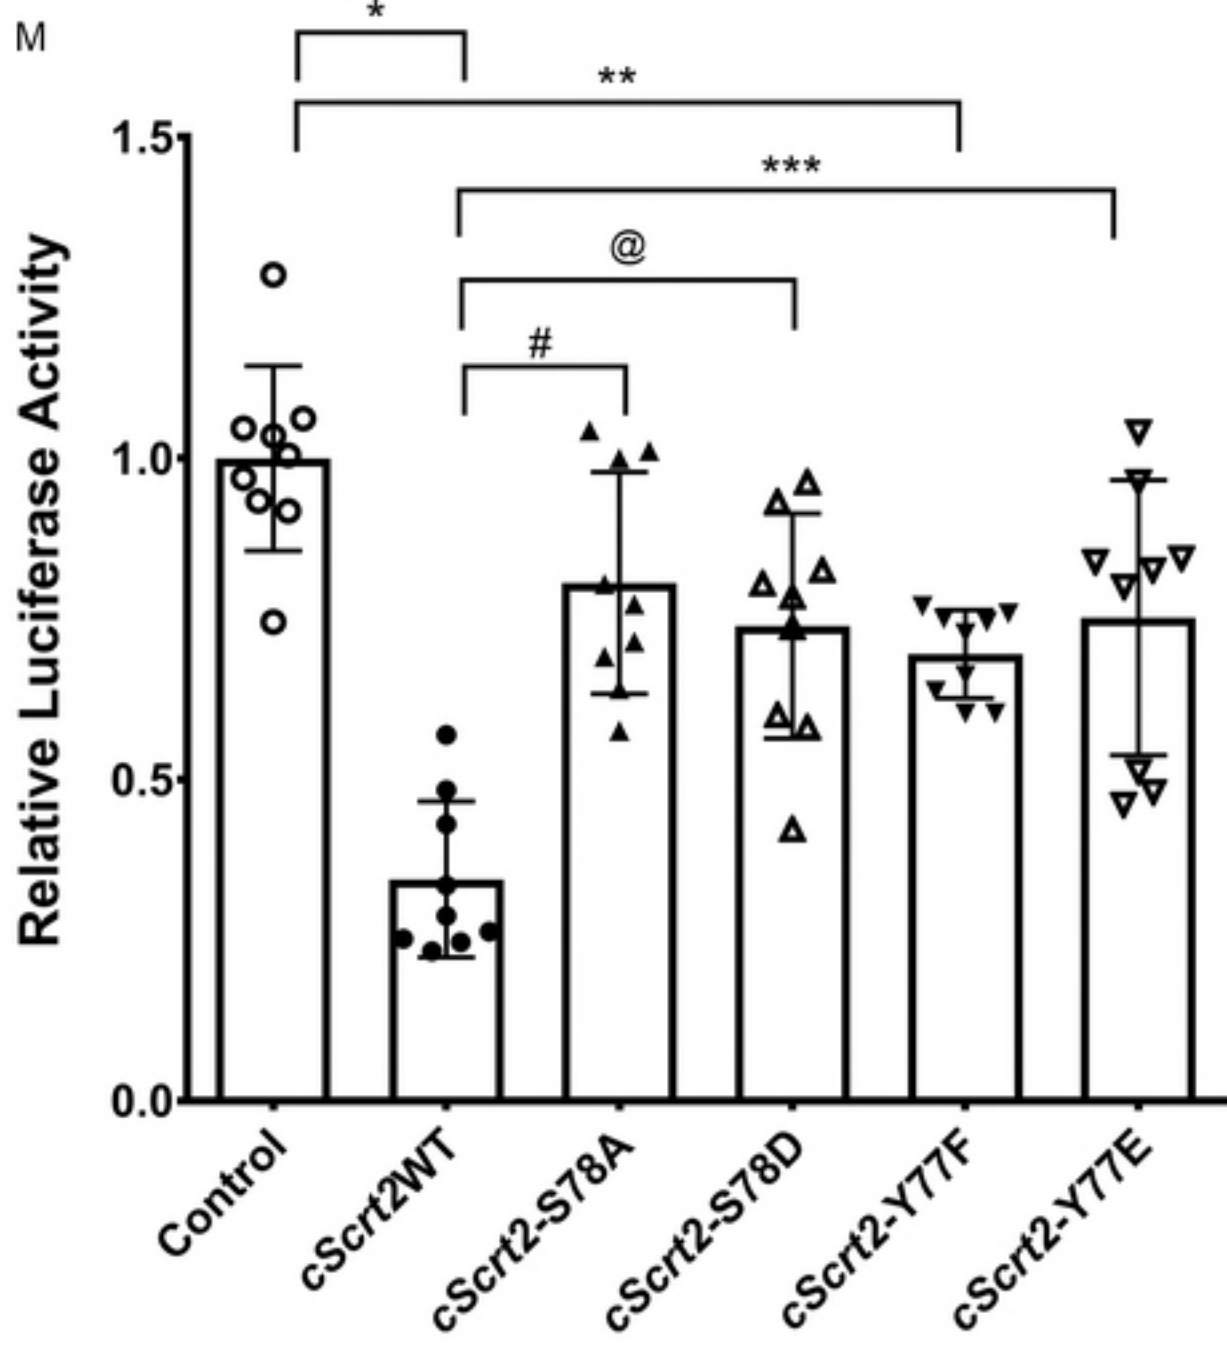

Relative Luciferase Activity

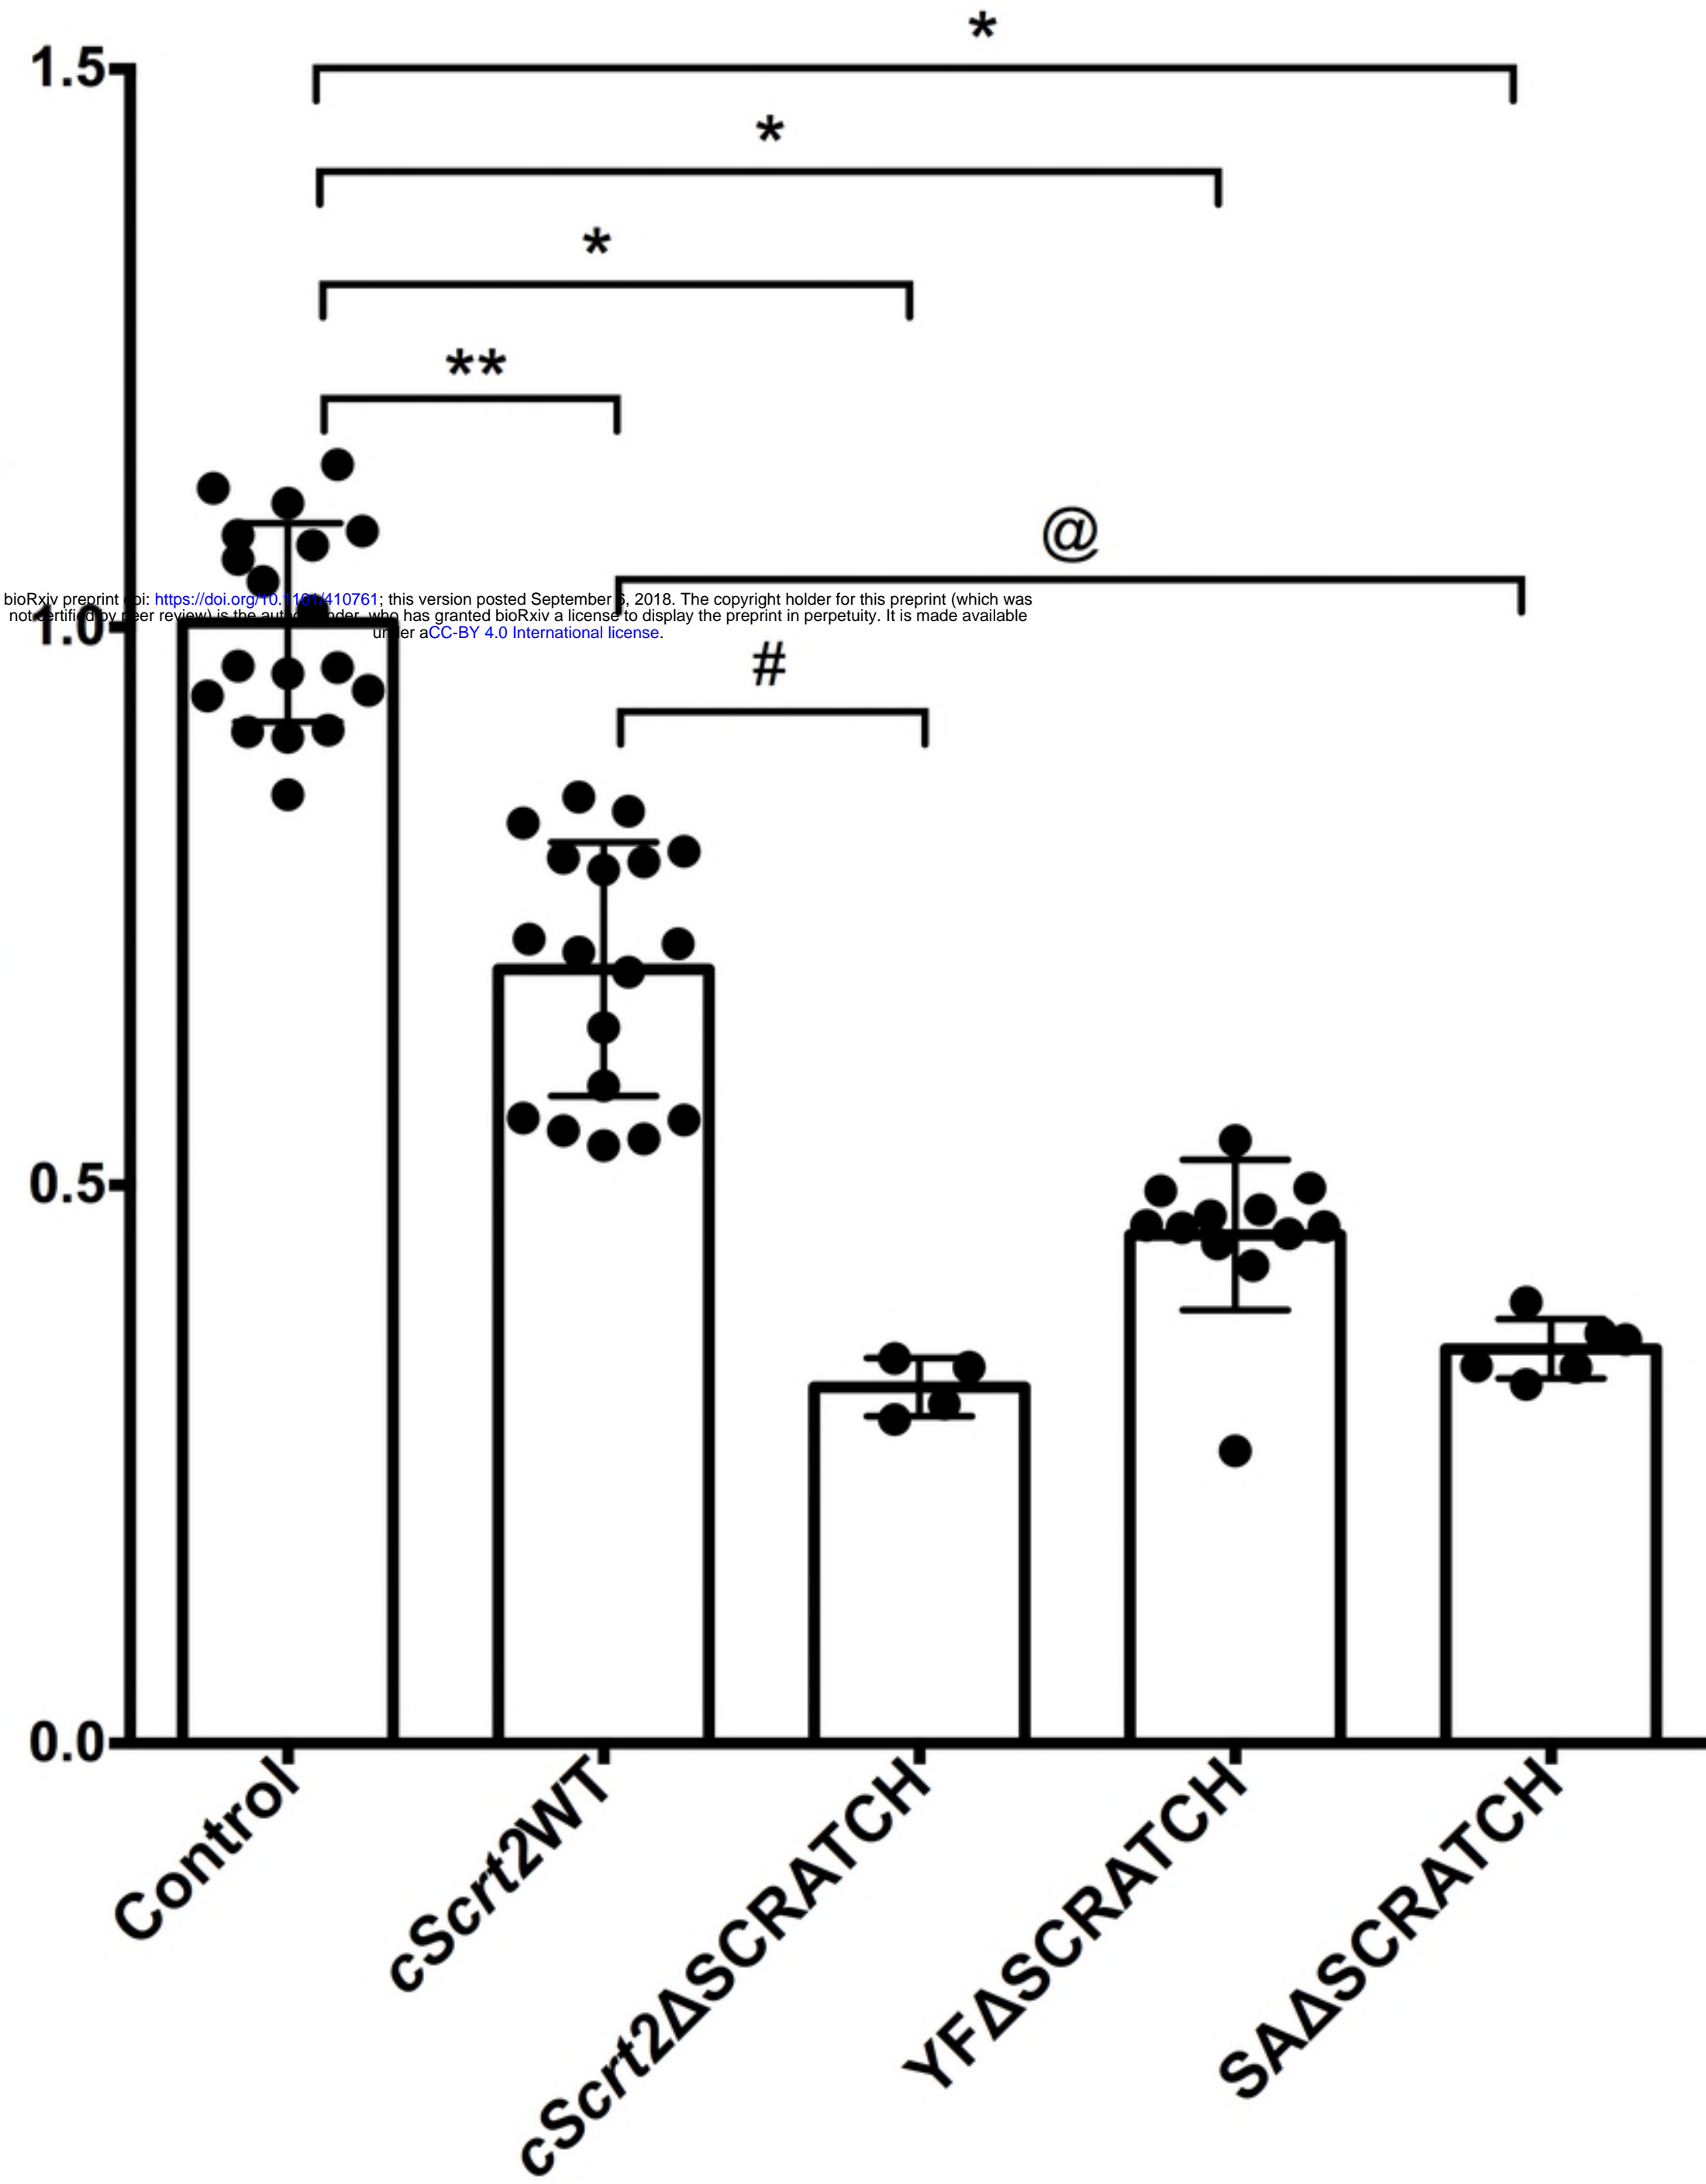

Source: https://www.biorxiv.org/content/10.1101/410761v1.full.pdf
